# Supplementary material for: The roles of PARP-1 and XPD and their potential interplay in repairing bupivacaine-induced neuron oxidative DNA damage
Source: Aging (Albany NY). 2021 Jan 20;13(3):4274–90. doi: 10.18632/aging.202390 (PMC7906168; doi:10.18632/aging.202390)
Supplement: Supplementary Table 1 [file aging-13-202390-s002.xlsx]

## Sheet: Sheet1
Supplementary Table 1. Identified proteins were classified according to annotations from the Uniport knowledge base (Swissport /TrEMBL, http://www.uniprot.org/) [10]. We only used ratios with p-values < 0.05, and only fold changes of >1.2 or <0.8 were considered as significant. 241 proteins were significantly different between the (1.5 mM) bupivacaine and Control groups and included 145 upregulat…
（Uniprot）Accession	Desription	Con-vs-Bup
tr|B3KXC3|B3KXC3_HUMAN	Ferritin OS=Homo sapiens PE=2 SV=1	2.03566
tr|A0A024R462|A0A024R462_HUMAN	Fibronectin 1, isoform CRA_n OS=Homo sapiens GN=FN1 PE=4 SV=1	1.64019
sp|Q8IUI8|CRLF3_HUMAN	Cytokine receptor-like factor 3 OS=Homo sapiens GN=CRLF3 PE=1 SV=2	1.48643
tr|A0A024R9I3|A0A024R9I3_HUMAN	N-myc downstream regulated gene 1, isoform CRA_b OS=Homo sapiens GN=NDRG1 PE=4 SV=1	1.4837
tr|K7EQ23|K7EQ23_HUMAN	Niemann-Pick C1 protein (Fragment) OS=Homo sapiens GN=NPC1 PE=1 SV=1	1.45321
sp|Q6ZT21|TMPPE_HUMAN	Transmembrane protein with metallophosphoesterase domain OS=Homo sapiens GN=TMPPE PE=2 SV=2	1.42401
tr|A0A024R3W6|A0A024R3W6_HUMAN	Neuropilin 2, isoform CRA_h OS=Homo sapiens GN=NRP2 PE=4 SV=1	1.4238
tr|A0A024RAJ5|A0A024RAJ5_HUMAN	Collagen, type IV, alpha 3 (Goodpasture antigen) binding protein, isoform CRA_a OS=Homo sapiens GN=COL4A3BP PE=4 SV=1	1.42082
tr|B2R6P3|B2R6P3_HUMAN	cDNA, FLJ93047, highly similar to Homo sapiens matrix metallopeptidase 14 (membrane-inserted) (MMP14), mRNA OS=Homo sapiens PE=2 SV=1	1.41868
tr|Q5QP56|Q5QP56_HUMAN	Bcl-2-like protein 1 (Fragment) OS=Homo sapiens GN=BCL2L1 PE=1 SV=1	1.40389
sp|Q9GZY8|MFF_HUMAN	Mitochondrial fission factor OS=Homo sapiens GN=MFF PE=1 SV=1 >tr|A0A024R491|A0A024R491_HUMAN Chromosome 2 open reading frame 33, isoform CRA_a OS=Homo sapiens GN=C2orf33 PE=4 SV=1	1.40337
sp|O94804|STK10_HUMAN	Serine/threonine-protein kinase 10 OS=Homo sapiens GN=STK10 PE=1 SV=1	1.40252
tr|A8K6H9|A8K6H9_HUMAN	cDNA FLJ75876, highly similar to Homo sapiens solute carrier family 38, member 2 (SLC38A2), mRNA OS=Homo sapiens PE=2 SV=1	1.40194
sp|Q9NQX7|ITM2C_HUMAN	Integral membrane protein 2C OS=Homo sapiens GN=ITM2C PE=1 SV=1 >tr|A0A024R466|A0A024R466_HUMAN Integral membrane protein 2C, isoform CRA_a OS=Homo sapiens GN=ITM2C PE=4 SV=1	1.38701
sp|Q9H488|OFUT1_HUMAN	GDP-fucose protein O-fucosyltransferase 1 OS=Homo sapiens GN=POFUT1 PE=1 SV=1	1.37982
tr|B2R608|B2R608_HUMAN	cDNA, FLJ92718, highly similar to Homo sapiens tripeptidyl peptidase I (TPP1), mRNA OS=Homo sapiens PE=2 SV=1	1.3793
sp|Q99698|LYST_HUMAN	Lysosomal-trafficking regulator OS=Homo sapiens GN=LYST PE=1 SV=3	1.37002
tr|B7Z3Q4|B7Z3Q4_HUMAN	cDNA FLJ51873, highly similar to Alkyldihydroxyacetonephosphate synthase, peroxisomal (EC 2.5.1.26) OS=Homo sapiens PE=2 SV=1	1.36757
sp|Q9UKV8|AGO2_HUMAN	Protein argonaute-2 OS=Homo sapiens GN=AGO2 PE=1 SV=3	1.36502
sp|Q14573|ITPR3_HUMAN	Inositol 1,4,5-trisphosphate receptor type 3 OS=Homo sapiens GN=ITPR3 PE=1 SV=2	1.36177
tr|B4E0E1|B4E0E1_HUMAN	cDNA FLJ53442, highly similar to Poly (ADP-ribose) polymerase 1 (EC 2.4.2.30) OS=Homo sapiens PE=2 SV=1	1.35923
tr|B3KRY3|B3KRY3_HUMAN	cDNA FLJ35079 fis, clone PLACE6005283, highly similar to Lysosome-associated membrane glycoprotein 1 OS=Homo sapiens PE=2 SV=1	1.35563
tr|A0A024R152|A0A024R152_HUMAN	HCG28765, isoform CRA_b OS=Homo sapiens GN=hCG_28765 PE=4 SV=1	1.35095
tr|Q5JUA8|Q5JUA8_HUMAN	Vacuolar protein sorting-associated protein 16 homolog OS=Homo sapiens GN=VPS16 PE=1 SV=1	1.34353
tr|B3KTK6|B3KTK6_HUMAN	cDNA FLJ38425 fis, clone FEBRA2012397, highly similar to Very low-density lipoprotein receptor OS=Homo sapiens PE=2 SV=1	1.33986
sp|P15090|FABP4_HUMAN	Fatty acid-binding protein, adipocyte OS=Homo sapiens GN=FABP4 PE=1 SV=3 >tr|E7DVW4|E7DVW4_HUMAN Epididymis secretory protein Li 104 OS=Homo sapiens GN=FABP4 PE=2 SV=1	1.3336
tr|A8K6X5|A8K6X5_HUMAN	cDNA FLJ78680, highly similar to Homo sapiens dishevelled associated activator of morphogenesis 1, mRNA OS=Homo sapiens PE=2 SV=1	1.3329
tr|B4DPF1|B4DPF1_HUMAN	cDNA FLJ56358, highly similar to Cytosolic nonspecific dipeptidase OS=Homo sapiens PE=2 SV=1	1.33098
sp|Q9NZ09|UBAP1_HUMAN	Ubiquitin-associated protein 1 OS=Homo sapiens GN=UBAP1 PE=1 SV=1	1.32854
tr|B2R9S4|B2R9S4_HUMAN	cDNA, FLJ94534, highly similar to Homo sapiens capping protein (actin filament), gelsolin-like(CAPG), mRNA OS=Homo sapiens PE=2 SV=1	1.32812
tr|B2R8A9|B2R8A9_HUMAN	cDNA, FLJ93812, highly similar to Homo sapiens branched chain keto acid dehydrogenase E1, alphapolypeptide (maple syrup urine disease) (BCKDHA), mRNA OS=Homo sapiens PE=2 SV=1	1.32618
tr|A4D2D2|A4D2D2_HUMAN	Procollagen C-endopeptidase enhancer OS=Homo sapiens GN=PCOLCE PE=4 SV=1	1.32212
sp|P36543|VATE1_HUMAN	V-type proton ATPase subunit E 1 OS=Homo sapiens GN=ATP6V1E1 PE=1 SV=1 >tr|Q53Y06|Q53Y06_HUMAN ATPase, H+ transporting, lysosomal 31kDa, V1 subunit E isoform 1 OS=Homo sapiens GN=ATP6V1E1 PE=2 SV=1	1.31674
tr|B2R5H5|B2R5H5_HUMAN	cDNA, FLJ92476, highly similar to Homo sapiens LSM3 homolog, U6 small nuclear RNA associated (S. cerevisiae) (LSM3), mRNA OS=Homo sapiens PE=2 SV=1	1.31428
tr|F5GX84|F5GX84_HUMAN	LIM and cysteine-rich domains protein 1 OS=Homo sapiens GN=LMCD1 PE=4 SV=2	1.31153
tr|A0A024R0L3|A0A024R0L3_HUMAN	POU domain protein OS=Homo sapiens GN=POU2F2 PE=3 SV=1	1.30827
tr|A0A075B730|A0A075B730_HUMAN	Epiplakin OS=Homo sapiens GN=EPPK1 PE=1 SV=2	1.30433
sp|P06753|TPM3_HUMAN	Tropomyosin alpha-3 chain OS=Homo sapiens GN=TPM3 PE=1 SV=2	1.30319
sp|Q99536|VAT1_HUMAN	Synaptic vesicle membrane protein VAT-1 homolog OS=Homo sapiens GN=VAT1 PE=1 SV=2 >tr|A0A024R1Z6|A0A024R1Z6_HUMAN Vesicle amine transport protein 1 homolog (T californica), isoform CRA_a OS=Homo sapiens GN=VAT1 PE=4 SV=1	1.30252
tr|G3V1D4|G3V1D4_HUMAN	Lin-7 homolog C (C. elegans), isoform CRA_b OS=Homo sapiens GN=LIN7C PE=4 SV=1	1.30208
sp|Q9UKU9|ANGL2_HUMAN	Angiopoietin-related protein 2 OS=Homo sapiens GN=ANGPTL2 PE=2 SV=1 >tr|A0A024R868|A0A024R868_HUMAN Angiopoietin-like 2, isoform CRA_a OS=Homo sapiens GN=ANGPTL2 PE=4 SV=1	1.30001
tr|A0A087WYV5|A0A087WYV5_HUMAN	Slit homolog 2 protein OS=Homo sapiens GN=SLIT2 PE=4 SV=1	1.29663
tr|B4DI39|B4DI39_HUMAN	cDNA FLJ54328, highly similar to Heat shock 70 kDa protein 1 OS=Homo sapiens PE=2 SV=1	1.29587
tr|A8E631|A8E631_HUMAN	KIAA1881 protein (Fragment) OS=Homo sapiens GN=KIAA1881 PE=2 SV=1	1.29257
sp|Q4G0N4|NAKD2_HUMAN	NAD kinase 2, mitochondrial OS=Homo sapiens GN=NADK2 PE=1 SV=2	1.2915
tr|D6R938|D6R938_HUMAN	Calcium/calmodulin-dependent protein kinase (CaM kinase) II delta, isoform CRA_e OS=Homo sapiens GN=CAMK2D PE=4 SV=1	1.29139
sp|O75348|VATG1_HUMAN	V-type proton ATPase subunit G 1 OS=Homo sapiens GN=ATP6V1G1 PE=1 SV=3 >tr|A0A024R883|A0A024R883_HUMAN ATPase, H+ transporting, lysosomal 13kDa, V1 subunit G1, isoform CRA_a OS=Homo sapiens GN=ATP6V1G1 PE=4 SV=1	1.28962
tr|K7ERZ3|K7ERZ3_HUMAN	Perilipin-3 (Fragment) OS=Homo sapiens GN=PLIN3 PE=1 SV=1	1.28918
sp|Q6IC98|GRAM4_HUMAN	GRAM domain-containing protein 4 OS=Homo sapiens GN=GRAMD4 PE=1 SV=1	1.28498
tr|F2Z2Y4|F2Z2Y4_HUMAN	Pyridoxal kinase OS=Homo sapiens GN=PDXK PE=1 SV=1	1.28284
tr|B4DGD0|B4DGD0_HUMAN	cDNA FLJ50491, highly similar to Amyloid beta A4 protein (APP) (ABPP)(Alzheimer disease amyloid protein) (Cerebral vascularamyloid peptide) (CVAP) (Protease nexin-II) (PN-II)(APPI) (PreA4) OS=Homo sapiens PE=2 SV=1	1.27927
tr|B4DKR0|B4DKR0_HUMAN	Syntaxin 5A, isoform CRA_c OS=Homo sapiens GN=STX5A PE=2 SV=1	1.27916
tr|B4DJB3|B4DJB3_HUMAN	cDNA FLJ55979, highly similar to Homo sapiens AE binding protein 1 (AEBP1), mRNA OS=Homo sapiens PE=2 SV=1	1.27147
tr|Q5SYZ4|Q5SYZ4_HUMAN	Cellular retinoic acid-binding protein 2 (Fragment) OS=Homo sapiens GN=CRABP2 PE=1 SV=1	1.27024
tr|B2RCG9|B2RCG9_HUMAN	cDNA, FLJ96065, highly similar to Homo sapiens protein phosphatase 4, regulatory subunit 1 (PPP4R1), mRNA OS=Homo sapiens PE=2 SV=1	1.27005
sp|Q9ULX6|AKP8L_HUMAN	A-kinase anchor protein 8-like OS=Homo sapiens GN=AKAP8L PE=1 SV=3	1.26983
sp|Q6P474|PDXD2_HUMAN	Putative pyridoxal-dependent decarboxylase domain-containing protein 2 OS=Homo sapiens GN=PDXDC2P PE=5 SV=3	1.26903
tr|A0A024R1K5|A0A024R1K5_HUMAN	Phosphatidylserine decarboxylase, isoform CRA_a OS=Homo sapiens GN=PISD PE=4 SV=1	1.26814
tr|H0YLI4|H0YLI4_HUMAN	LDLR chaperone MESD OS=Homo sapiens GN=MESDC2 PE=1 SV=1	1.26814
sp|P45954|ACDSB_HUMAN	Short/branched chain specific acyl-CoA dehydrogenase, mitochondrial OS=Homo sapiens GN=ACADSB PE=1 SV=1	1.26735
tr|A0A024R329|A0A024R329_HUMAN	GDP-mannose pyrophosphorylase B, isoform CRA_a OS=Homo sapiens GN=GMPPB PE=4 SV=1	1.26695
tr|B3KMC3|B3KMC3_HUMAN	cDNA FLJ10681 fis, clone NT2RP3000031, highly similar to Histone deacetylase 6 OS=Homo sapiens PE=2 SV=1	1.26449
sp|Q7Z5P4|DHB13_HUMAN	17-beta-hydroxysteroid dehydrogenase 13 OS=Homo sapiens GN=HSD17B13 PE=2 SV=1	1.26428
sp|Q9ULD0|OGDHL_HUMAN	2-oxoglutarate dehydrogenase-like, mitochondrial OS=Homo sapiens GN=OGDHL PE=1 SV=3	1.26369
sp|Q8N335|GPD1L_HUMAN	Glycerol-3-phosphate dehydrogenase 1-like protein OS=Homo sapiens GN=GPD1L PE=1 SV=1	1.2629
tr|B4DSM4|B4DSM4_HUMAN	cDNA FLJ57495, highly similar to MKI67 FHA domain-interacting nucleolar phosphoprotein OS=Homo sapiens PE=2 SV=1	1.2604
tr|B4DQJ4|B4DQJ4_HUMAN	cDNA FLJ59213, highly similar to Nuclear valosin-containing protein-like OS=Homo sapiens PE=2 SV=1	1.25814
tr|A6NJF2|A6NJF2_HUMAN	Natriuretic peptide receptor B/guanylate cyclase B (Atrionatriuretic peptide receptor B) variant 3 OS=Homo sapiens GN=NPR2 PE=4 SV=1	1.25719
tr|A0A024R478|A0A024R478_HUMAN	COP9 constitutive photomorphogenic homolog subunit 7B (Arabidopsis), isoform CRA_a OS=Homo sapiens GN=COPS7B PE=4 SV=1	1.25601
tr|I3L305|I3L305_HUMAN	Syntaxin-8 (Fragment) OS=Homo sapiens GN=STX8 PE=1 SV=2	1.25377
tr|Q05DA4|Q05DA4_HUMAN	P4HA2 protein OS=Homo sapiens GN=P4HA2 PE=2 SV=1	1.25366
tr|D3DQR0|D3DQR0_HUMAN	Protein kinase C and casein kinase substrate in neurons 3, isoform CRA_b OS=Homo sapiens GN=PACSIN3 PE=4 SV=1	1.25321
sp|Q3V6T2|GRDN_HUMAN	Girdin OS=Homo sapiens GN=CCDC88A PE=1 SV=2	1.25148
sp|Q8N442|GUF1_HUMAN	Translation factor GUF1, mitochondrial OS=Homo sapiens GN=GUF1 PE=1 SV=1 >tr|A0A024R9T3|A0A024R9T3_HUMAN Translation factor GUF1, mitochondrial OS=Homo sapiens GN=GUF1 PE=3 SV=1	1.25068
tr|B4DUB1|B4DUB1_HUMAN	cDNA FLJ50029, highly similar to Cell division cycle 2-like protein kinase 6 (EC 2.7.11.22) OS=Homo sapiens PE=2 SV=1	1.25044
tr|B3KNI0|B3KNI0_HUMAN	cDNA FLJ14646 fis, clone NT2RP2001883, highly similar to Homo sapiens CGI-01 protein mRNA OS=Homo sapiens PE=2 SV=1	1.24999
tr|B2RAK1|B2RAK1_HUMAN	cDNA, FLJ94965, highly similar to Homo sapiens leucyl/cystinyl aminopeptidase (LNPEP), mRNA OS=Homo sapiens PE=2 SV=1	1.24975
sp|P10155|RO60_HUMAN	60 kDa SS-A/Ro ribonucleoprotein OS=Homo sapiens GN=TROVE2 PE=1 SV=2 >tr|A0A024R983|A0A024R983_HUMAN TROVE domain family, member 2, isoform CRA_b OS=Homo sapiens GN=TROVE2 PE=4 SV=1	1.24958
tr|B4DSG5|B4DSG5_HUMAN	cDNA FLJ56149, highly similar to Tax1-binding protein 1 OS=Homo sapiens PE=2 SV=1	1.24943
tr|A0A024R4X0|A0A024R4X0_HUMAN	NADH-cytochrome b5 reductase OS=Homo sapiens GN=CYB5R3 PE=3 SV=1	1.24625
tr|B4DZK8|B4DZK8_HUMAN	cDNA FLJ61192, highly similar to Erythrocyte band 7 integral membrane protein OS=Homo sapiens PE=2 SV=1	1.24533
tr|A0A0A0MTJ9|A0A0A0MTJ9_HUMAN	Neutral cholesterol ester hydrolase 1 OS=Homo sapiens GN=NCEH1 PE=4 SV=1	1.24508
sp|P84103|SRSF3_HUMAN	Serine/arginine-rich splicing factor 3 OS=Homo sapiens GN=SRSF3 PE=1 SV=1 >tr|B2R6F3|B2R6F3_HUMAN Splicing factor arginine/serine-rich 3 OS=Homo sapiens GN=SFRS3 PE=2 SV=1	1.24456
tr|Q53X12|Q53X12_HUMAN	V-type proton ATPase subunit a OS=Homo sapiens PE=1 SV=1	1.24369
tr|C9JSK0|C9JSK0_HUMAN	Protein unc-119 homolog A (Fragment) OS=Homo sapiens GN=UNC119 PE=4 SV=1	1.24129
sp|Q92615|LAR4B_HUMAN	La-related protein 4B OS=Homo sapiens GN=LARP4B PE=1 SV=3	1.24093
tr|B4DZR0|B4DZR0_HUMAN	cDNA FLJ55529, highly similar to Heat shock 70 kDa protein 4L OS=Homo sapiens PE=2 SV=1	1.24082
sp|Q969S3|ZN622_HUMAN	Zinc finger protein 622 OS=Homo sapiens GN=ZNF622 PE=1 SV=1	1.24075
sp|Q9BV81|EMC6_HUMAN	ER membrane protein complex subunit 6 OS=Homo sapiens GN=EMC6 PE=1 SV=1	1.24021
tr|B3KRB7|B3KRB7_HUMAN	Inhibitor of kappa light polypeptide gene enhancer in B-cells, kinase beta, isoform CRA_a OS=Homo sapiens GN=IKBKB PE=2 SV=1	1.23933
tr|Q53HF3|Q53HF3_HUMAN	Galactosidase, alpha variant (Fragment) OS=Homo sapiens PE=2 SV=1	1.23833
tr|Q2Z1P3|Q2Z1P3_HUMAN	Putative uncharacterized protein GAF1 (Fragment) OS=Homo sapiens GN=GAF1 PE=4 SV=1	1.23759
tr|B4DPV8|B4DPV8_HUMAN	cDNA FLJ51928, highly similar to Keratinocytes-associated transmembrane protein 2 OS=Homo sapiens PE=2 SV=1	1.23554
tr|H0YIJ6|H0YIJ6_HUMAN	Phosphatidylinositol 5-phosphate 4-kinase type-2 gamma (Fragment) OS=Homo sapiens GN=PIP4K2C PE=1 SV=4	1.23491
tr|Q6URC4|Q6URC4_HUMAN	Diaphanous 1 OS=Homo sapiens PE=2 SV=1	1.2336
tr|F8W9X7|F8W9X7_HUMAN	Coiled-coil domain-containing protein 93 OS=Homo sapiens GN=CCDC93 PE=1 SV=1	1.23352
tr|B2RAQ5|B2RAQ5_HUMAN	cDNA, FLJ95054 OS=Homo sapiens PE=2 SV=1	1.2331
tr|B5MC96|B5MC96_HUMAN	HCLS1-binding protein 3 OS=Homo sapiens GN=HS1BP3 PE=1 SV=1	1.23292
tr|B8ZZT4|B8ZZT4_HUMAN	Vesicle-associated membrane protein 8 OS=Homo sapiens GN=VAMP8 PE=1 SV=1	1.23233
sp|Q16864|VATF_HUMAN	V-type proton ATPase subunit F OS=Homo sapiens GN=ATP6V1F PE=1 SV=2 >tr|A4D1K0|A4D1K0_HUMAN V-type proton ATPase subunit F OS=Homo sapiens GN=ATP6V1F PE=2 SV=1	1.22865
tr|A8K2Q6|A8K2Q6_HUMAN	Peptidyl-prolyl cis-trans isomerase OS=Homo sapiens PE=2 SV=1	1.22817
tr|B3KSN1|B3KSN1_HUMAN	cDNA FLJ36670 fis, clone UTERU2004037, highly similar to Conserved oligomeric Golgi complex component 7 OS=Homo sapiens PE=2 SV=1	1.22755
sp|Q9C0D5|TANC1_HUMAN	Protein TANC1 OS=Homo sapiens GN=TANC1 PE=1 SV=3	1.22638
sp|Q96LD4|TRI47_HUMAN	Tripartite motif-containing protein 47 OS=Homo sapiens GN=TRIM47 PE=1 SV=2	1.22524
tr|D6RBL5|D6RBL5_HUMAN	Annexin OS=Homo sapiens GN=ANXA5 PE=1 SV=1	1.22488
tr|G3XAN8|G3XAN8_HUMAN	Mitochondrial import inner membrane translocase subunit Tim8 B OS=Homo sapiens GN=TIMM8B PE=4 SV=1	1.22406
sp|P31937|3HIDH_HUMAN	3-hydroxyisobutyrate dehydrogenase, mitochondrial OS=Homo sapiens GN=HIBADH PE=1 SV=2 >tr|A0A024RA75|A0A024RA75_HUMAN 3-hydroxyisobutyrate dehydrogenase OS=Homo sapiens GN=HIBADH PE=3 SV=1	1.2227
sp|Q15084|PDIA6_HUMAN	Protein disulfide-isomerase A6 OS=Homo sapiens GN=PDIA6 PE=1 SV=1	1.22225
tr|Q53EY4|Q53EY4_HUMAN	RAB31, member RAS oncogene family variant (Fragment) OS=Homo sapiens PE=2 SV=1	1.22014
tr|B4E290|B4E290_HUMAN	cDNA FLJ50039, highly similar to Homo sapiens solute carrier family 25, member 24, transcript variant 1, mRNA OS=Homo sapiens PE=2 SV=1	1.21926
tr|B2R5M9|B2R5M9_HUMAN	cDNA, FLJ92537, highly similar to Homo sapiens procollagen-lysine, 2-oxoglutarate 5-dioxygenase (lysine hydroxylase, Ehlers-Danlos syndrome type VI) (PLOD), mRNA OS=Homo sapiens PE=2 SV=1	1.21871
tr|A0A024R595|A0A024R595_HUMAN	Signal-induced proliferation-associated gene 1, isoform CRA_a OS=Homo sapiens GN=SIPA1 PE=4 SV=1	1.21848
tr|Q6LD48|Q6LD48_HUMAN	Stat2 type a (Fragment) OS=Homo sapiens GN=Stat2 PE=4 SV=1	1.21817
sp|P22681|CBL_HUMAN	E3 ubiquitin-protein ligase CBL OS=Homo sapiens GN=CBL PE=1 SV=2	1.21809
tr|Q59FD0|Q59FD0_HUMAN	Huntingtin interacting protein-1-related (Fragment) OS=Homo sapiens PE=2 SV=1	1.21799
tr|F8W930|F8W930_HUMAN	Insulin-like growth factor 2 mRNA-binding protein 2 OS=Homo sapiens GN=IGF2BP2 PE=1 SV=1	1.21792
tr|E7BJU4|E7BJU4_HUMAN	Heme oxygenase 1 (Fragment) OS=Homo sapiens GN=HO1 PE=2 SV=1	1.21684
sp|P50552|VASP_HUMAN	Vasodilator-stimulated phosphoprotein OS=Homo sapiens GN=VASP PE=1 SV=3 >tr|A0A024R0V4|A0A024R0V4_HUMAN Vasodilator-stimulated phosphoprotein, isoform CRA_a OS=Homo sapiens GN=VASP PE=4 SV=1	1.2166
sp|Q9UBV8|PEF1_HUMAN	Peflin OS=Homo sapiens GN=PEF1 PE=1 SV=1	1.21636
tr|G5E9V5|G5E9V5_HUMAN	28S ribosomal protein S22, mitochondrial OS=Homo sapiens GN=MRPS22 PE=1 SV=1	1.21563
sp|P38606|VATA_HUMAN	V-type proton ATPase catalytic subunit A OS=Homo sapiens GN=ATP6V1A PE=1 SV=2	1.21284
tr|J3QRR6|J3QRR6_HUMAN	Glycerophosphodiester phosphodiesterase domain-containing protein 1 (Fragment) OS=Homo sapiens GN=GDPD1 PE=1 SV=1	1.21277
sp|O15525|MAFG_HUMAN	Transcription factor MafG OS=Homo sapiens GN=MAFG PE=1 SV=1 >tr|A0A024R8X1|A0A024R8X1_HUMAN HCG1991559, isoform CRA_f OS=Homo sapiens GN=hCG_1991559 PE=4 SV=1	1.21177
sp|Q8IZ83|A16A1_HUMAN	Aldehyde dehydrogenase family 16 member A1 OS=Homo sapiens GN=ALDH16A1 PE=1 SV=2	1.21146
tr|A4D1P0|A4D1P0_HUMAN	Uncharacterized protein OS=Homo sapiens GN=LOC402299 PE=4 SV=1	1.21105
tr|A0A0A0MSN9|A0A0A0MSN9_HUMAN	Negative elongation factor E (Fragment) OS=Homo sapiens GN=NELFE PE=4 SV=2	1.21056
tr|G3V599|G3V599_HUMAN	Uncharacterized protein OS=Homo sapiens PE=4 SV=1	1.21036
tr|M0R1B0|M0R1B0_HUMAN	ER membrane protein complex subunit 8 (Fragment) OS=Homo sapiens GN=EMC8 PE=1 SV=1	1.20875
tr|B4DEQ7|B4DEQ7_HUMAN	cDNA FLJ50003, highly similar to Homo sapiens leucine-rich repeats and calponin homology (CH) domain containing 3 (LRCH3), mRNA OS=Homo sapiens PE=2 SV=1	1.20826
tr|B0QY01|B0QY01_HUMAN	Target of Myb protein 1 (Fragment) OS=Homo sapiens GN=TOM1 PE=1 SV=4	1.20794
sp|Q8TCS8|PNPT1_HUMAN	Polyribonucleotide nucleotidyltransferase 1, mitochondrial OS=Homo sapiens GN=PNPT1 PE=1 SV=2	1.20708
tr|A2VDI4|A2VDI4_HUMAN	EFR3A protein (Fragment) OS=Homo sapiens GN=EFR3A PE=2 SV=1	1.20689
tr|A0A087WUW6|A0A087WUW6_HUMAN	NF-kappa-B essential modulator OS=Homo sapiens GN=IKBKG PE=1 SV=1	1.20663
sp|Q8TDZ2|MICA1_HUMAN	Protein-methionine sulfoxide oxidase MICAL1 OS=Homo sapiens GN=MICAL1 PE=1 SV=2	1.20619
tr|B3KNH1|B3KNH1_HUMAN	cDNA FLJ14598 fis, clone NT2RM4002558, highly similar to Long-chain fatty acid transport protein 4 (EC 6.2.1.-) OS=Homo sapiens PE=2 SV=1	1.20612
tr|A0A087X0R6|A0A087X0R6_HUMAN	Sorting nexin-12 OS=Homo sapiens GN=SNX12 PE=1 SV=1	1.20589
tr|B3KR70|B3KR70_HUMAN	cDNA FLJ33764 fis, clone BRCOC2000360, highly similar to Vacuolar ATP synthase subunit S1 (EC 3.6.3.14) OS=Homo sapiens PE=2 SV=1	1.20402
tr|B2RB23|B2RB23_HUMAN	cDNA, FLJ95265, highly similar to Homo sapiens acetyl-Coenzyme A acyltransferase 2 (mitochondrial 3-oxoacyl-Coenzyme A thiolase) (ACAA2), nuclear gene encoding mitochondrial protein, mRNA OS=Homo sapiens PE=2 SV=1	1.2035
tr|E9PJF0|E9PJF0_HUMAN	Mitogen-activated protein kinase OS=Homo sapiens GN=MAPK3 PE=1 SV=1	1.20307
tr|H3BRB6|H3BRB6_HUMAN	E3 ubiquitin-protein ligase ZNRF1 OS=Homo sapiens GN=ZNRF1 PE=1 SV=1	1.20295
sp|Q9NPJ3|ACO13_HUMAN	Acyl-coenzyme A thioesterase 13 OS=Homo sapiens GN=ACOT13 PE=1 SV=1	1.20271
tr|A8K0A4|A8K0A4_HUMAN	cDNA FLJ77631, highly similar to Homo sapiens HLA-B associated transcript 5 (BAT5), mRNA OS=Homo sapiens PE=2 SV=1	1.20223
tr|K7EMC7|K7EMC7_HUMAN	Cytoglobin OS=Homo sapiens GN=CYGB PE=3 SV=1	1.20209
sp|Q9H3H3|CK068_HUMAN	UPF0696 protein C11orf68 OS=Homo sapiens GN=C11orf68 PE=1 SV=2	1.20156
sp|O15066|KIF3B_HUMAN	Kinesin-like protein KIF3B OS=Homo sapiens GN=KIF3B PE=1 SV=1	1.20024
tr|Q6LAP8|Q6LAP8_HUMAN	Mitochondrial citrate transport protein (Fragment) OS=Homo sapiens PE=3 SV=1	0.799264
sp|Q59GN2|R39L5_HUMAN	Putative 60S ribosomal protein L39-like 5 OS=Homo sapiens GN=RPL39P5 PE=5 SV=2	0.798912
tr|B4DP44|B4DP44_HUMAN	cDNA FLJ60751, highly similar to Protein arginine N-methyltransferase 3 (EC 2.1.1.-) OS=Homo sapiens PE=2 SV=1	0.798084
sp|Q9NR33|DPOE4_HUMAN	DNA polymerase epsilon subunit 4 OS=Homo sapiens GN=POLE4 PE=1 SV=2	0.796521
tr|A6PVX3|A6PVX3_HUMAN	26S proteasome non-ATPase regulatory subunit 4 (Fragment) OS=Homo sapiens GN=PSMD4 PE=1 SV=1	0.796224
tr|A8K9B9|A8K9B9_HUMAN	cDNA FLJ77391, highly similar to Homo sapiens EH-domain containing 4 (EHD4), mRNA OS=Homo sapiens PE=2 SV=1	0.795891
tr|B1AJW3|B1AJW3_HUMAN	1-phosphatidylinositol 4,5-bisphosphate phosphodiesterase beta-4 (Fragment) OS=Homo sapiens GN=PLCB4 PE=4 SV=1	0.794786
tr|A0A090N8P3|A0A090N8P3_HUMAN	FK506 binding protein 9, 63 kDa OS=Homo sapiens GN=FKBP9 PE=4 SV=1	0.794301
sp|Q9Y3U8|RL36_HUMAN	60S ribosomal protein L36 OS=Homo sapiens GN=RPL36 PE=1 SV=3	0.793997
sp|O94822|LTN1_HUMAN	E3 ubiquitin-protein ligase listerin OS=Homo sapiens GN=LTN1 PE=1 SV=6	0.792451
tr|B3KS69|B3KS69_HUMAN	cDNA FLJ35627 fis, clone SPLEN2011139, highly similar to AMSH-like protease (EC 3.1.2.15) OS=Homo sapiens PE=2 SV=1	0.791946
tr|B4DMU4|B4DMU4_HUMAN	cDNA FLJ59935, highly similar to Protein FAM45A OS=Homo sapiens PE=2 SV=1	0.791755
tr|B4DDF4|B4DDF4_HUMAN	Calponin OS=Homo sapiens GN=CNN2 PE=2 SV=1	0.790908
sp|Q8TDN6|BRX1_HUMAN	Ribosome biogenesis protein BRX1 homolog OS=Homo sapiens GN=BRIX1 PE=1 SV=2	0.790192
tr|B2R6K4|B2R6K4_HUMAN	cDNA, FLJ92996, highly similar to Homo sapiens guanine nucleotide binding protein (G protein), beta polypeptide 1 (GNB1), mRNA OS=Homo sapiens PE=2 SV=1	0.789673
tr|B9EIP9|B9EIP9_HUMAN	Uncharacterized protein OS=Homo sapiens PE=2 SV=1	0.78949
tr|B4DH39|B4DH39_HUMAN	cDNA FLJ57028, highly similar to Long-chain-fatty-acid--CoA ligase 4 (EC 6.2.1.3) OS=Homo sapiens PE=2 SV=1	0.789096
sp|P28749|RBL1_HUMAN	Retinoblastoma-like protein 1 OS=Homo sapiens GN=RBL1 PE=1 SV=3	0.788802
sp|O00488|ZN593_HUMAN	Zinc finger protein 593 OS=Homo sapiens GN=ZNF593 PE=1 SV=2	0.785406
sp|Q9BPX3|CND3_HUMAN	Condensin complex subunit 3 OS=Homo sapiens GN=NCAPG PE=1 SV=1	0.7825
tr|B2R6A9|B2R6A9_HUMAN	cDNA, FLJ92868, highly similar to Homo sapiens HIRA interacting protein 3 (HIRIP3), mRNA OS=Homo sapiens PE=2 SV=1	0.781833
sp|P62280|RS11_HUMAN	40S ribosomal protein S11 OS=Homo sapiens GN=RPS11 PE=1 SV=3	0.781316
tr|Q59GY2|Q59GY2_HUMAN	Ribosomal protein L4 variant (Fragment) OS=Homo sapiens PE=2 SV=1	0.780181
tr|J3KTE4|J3KTE4_HUMAN	Ribosomal protein L19 OS=Homo sapiens GN=RPL19 PE=3 SV=1	0.780079
sp|Q16531|DDB1_HUMAN	DNA damage-binding protein 1 OS=Homo sapiens GN=DDB1 PE=1 SV=1	0.777271
tr|K7EM18|K7EM18_HUMAN	Eukaryotic translation initiation factor 1 OS=Homo sapiens GN=EIF1 PE=1 SV=1	0.775817
tr|B4DLA1|B4DLA1_HUMAN	cDNA FLJ53453, highly similar to EH-domain-containing protein 2 OS=Homo sapiens PE=2 SV=1	0.773857
sp|P41223|BUD31_HUMAN	Protein BUD31 homolog OS=Homo sapiens GN=BUD31 PE=1 SV=2	0.773489
tr|J3KPG2|J3KPG2_HUMAN	Translationally-controlled tumor protein OS=Homo sapiens GN=TPT1 PE=1 SV=1	0.773182
tr|J3KTA4|J3KTA4_HUMAN	Probable ATP-dependent RNA helicase DDX5 OS=Homo sapiens GN=DDX5 PE=1 SV=1	0.771937
tr|Q1W6G4|Q1W6G4_HUMAN	LUC7-like (S. cerevisiae) OS=Homo sapiens GN=LUC7L PE=4 SV=1	0.771624
tr|A4D2P0|A4D2P0_HUMAN	Ras-related C3 botulinum toxin substrate 1 (Rho family, small GTP binding protein Rac1) OS=Homo sapiens GN=RAC1 PE=2 SV=1	0.771039
tr|E7ESY4|E7ESY4_HUMAN	Metastasis-associated protein MTA1 OS=Homo sapiens GN=MTA1 PE=1 SV=1	0.768402
tr|A0A024R5S9|A0A024R5S9_HUMAN	E3 ubiquitin-protein ligase OS=Homo sapiens GN=NEDD4 PE=4 SV=1	0.765898
sp|P23919|KTHY_HUMAN	Thymidylate kinase OS=Homo sapiens GN=DTYMK PE=1 SV=4 >tr|Q6FGU2|Q6FGU2_HUMAN DTYMK protein (Fragment) OS=Homo sapiens GN=DTYMK PE=2 SV=1	0.763261
tr|Q6NVW7|Q6NVW7_HUMAN	Importin subunit alpha OS=Homo sapiens GN=KPNA2 PE=2 SV=1	0.761088
sp|Q9BTT0|AN32E_HUMAN	Acidic leucine-rich nuclear phosphoprotein 32 family member E OS=Homo sapiens GN=ANP32E PE=1 SV=1	0.760948
sp|O14556|G3PT_HUMAN	Glyceraldehyde-3-phosphate dehydrogenase, testis-specific OS=Homo sapiens GN=GAPDHS PE=1 SV=2	0.760629
sp|P42574|CASP3_HUMAN	Caspase-3 OS=Homo sapiens GN=CASP3 PE=1 SV=2	0.755981
sp|P27694|RFA1_HUMAN	Replication protein A 70 kDa DNA-binding subunit OS=Homo sapiens GN=RPA1 PE=1 SV=2	0.755297
sp|P18077|RL35A_HUMAN	60S ribosomal protein L35a OS=Homo sapiens GN=RPL35A PE=1 SV=2	0.753517
sp|O14929|HAT1_HUMAN	Histone acetyltransferase type B catalytic subunit OS=Homo sapiens GN=HAT1 PE=1 SV=1	0.752122
tr|A8K3Y5|A8K3Y5_HUMAN	cDNA FLJ78186 OS=Homo sapiens PE=2 SV=1	0.752107
sp|P62879|GBB2_HUMAN	Guanine nucleotide-binding protein G(I)/G(S)/G(T) subunit beta-2 OS=Homo sapiens GN=GNB2 PE=1 SV=3 >tr|Q6FHM2|Q6FHM2_HUMAN GNB2 protein OS=Homo sapiens GN=GNB2 PE=2 SV=1	0.751878
sp|P20290|BTF3_HUMAN	Transcription factor BTF3 OS=Homo sapiens GN=BTF3 PE=1 SV=1	0.751197
tr|Q6DKI9|Q6DKI9_HUMAN	DNA-directed RNA polymerase (Fragment) OS=Homo sapiens GN=POLR1B PE=2 SV=1	0.750662
tr|A0PJ62|A0PJ62_HUMAN	RPL14 protein (Fragment) OS=Homo sapiens GN=RPL14 PE=2 SV=1	0.749457
sp|Q8NF37|PCAT1_HUMAN	Lysophosphatidylcholine acyltransferase 1 OS=Homo sapiens GN=LPCAT1 PE=1 SV=2	0.748309
sp|Q2VIQ3|KIF4B_HUMAN	Chromosome-associated kinesin KIF4B OS=Homo sapiens GN=KIF4B PE=2 SV=2	0.744977
tr|B3KXF9|B3KXF9_HUMAN	cDNA FLJ45348 fis, clone BRHIP3011269, weakly similar to Prenylcysteine oxidase (EC 1.8.3.5) OS=Homo sapiens PE=2 SV=1	0.744545
sp|Q9NPQ8|RIC8A_HUMAN	Synembryn-A OS=Homo sapiens GN=RIC8A PE=1 SV=3	0.74389
tr|Q5VYL4|Q5VYL4_HUMAN	Abnormal spindle-like microcephaly-associated protein OS=Homo sapiens GN=ASPM PE=4 SV=1	0.743692
tr|H0Y322|H0Y322_HUMAN	Protein lin-9 homolog (Fragment) OS=Homo sapiens GN=LIN9 PE=1 SV=1	0.742916
tr|Q8N5Z7|Q8N5Z7_HUMAN	60S ribosomal protein L6 OS=Homo sapiens GN=RPL6 PE=2 SV=1	0.74032
sp|P46781|RS9_HUMAN	40S ribosomal protein S9 OS=Homo sapiens GN=RPS9 PE=1 SV=3 >tr|A0A024R4M0|A0A024R4M0_HUMAN Ribosomal protein S9, isoform CRA_a OS=Homo sapiens GN=RPS9 PE=3 SV=1	0.740004
tr|M0QXC5|M0QXC5_HUMAN	Napsin-A (Fragment) OS=Homo sapiens GN=NAPSA PE=3 SV=1	0.739443
tr|H0YNW5|H0YNW5_HUMAN	Deoxyuridine 5~-triphosphate nucleotidohydrolase, mitochondrial OS=Homo sapiens GN=DUT PE=1 SV=1	0.736959
tr|Q7Z3R8|Q7Z3R8_HUMAN	DNA-directed RNA polymerase OS=Homo sapiens GN=DKFZp686D10173 PE=2 SV=1	0.734454
sp|P61586|RHOA_HUMAN	Transforming protein RhoA OS=Homo sapiens GN=RHOA PE=1 SV=1 >tr|A0A024R324|A0A024R324_HUMAN Ras homolog gene family, member A, isoform CRA_a OS=Homo sapiens GN=RHOA PE=3 SV=1	0.724844
sp|P62888|RL30_HUMAN	60S ribosomal protein L30 OS=Homo sapiens GN=RPL30 PE=1 SV=2 >tr|A0A024R9D3|A0A024R9D3_HUMAN Ribosomal protein L30, isoform CRA_b OS=Homo sapiens GN=RPL30 PE=3 SV=1	0.724156
tr|A8K6Q8|A8K6Q8_HUMAN	cDNA FLJ75881, highly similar to Homo sapiens transferrin receptor (p90, CD71) (TFRC), mRNA OS=Homo sapiens PE=2 SV=1	0.72415
tr|A2RRC9|A2RRC9_HUMAN	IQ motif containing GTPase activating protein 3 OS=Homo sapiens GN=IQGAP3 PE=2 SV=1	0.717272
sp|Q16658|FSCN1_HUMAN	Fascin OS=Homo sapiens GN=FSCN1 PE=1 SV=3	0.716395
sp|P23381|SYWC_HUMAN	Tryptophan--tRNA ligase, cytoplasmic OS=Homo sapiens GN=WARS PE=1 SV=2 >tr|A0A024R6K8|A0A024R6K8_HUMAN Tryptophanyl-tRNA synthetase, isoform CRA_a OS=Homo sapiens GN=WARS PE=3 SV=1	0.714427
tr|A8MXL6|A8MXL6_HUMAN	Protein SEC13 homolog OS=Homo sapiens GN=SEC13 PE=1 SV=1	0.713786
tr|A0A096LNV3|A0A096LNV3_HUMAN	E3 ubiquitin-protein ligase RNF114 (Fragment) OS=Homo sapiens GN=RNF114 PE=1 SV=1	0.706969
tr|B4DNN4|B4DNN4_HUMAN	Ribonucleoside-diphosphate reductase OS=Homo sapiens PE=2 SV=1	0.705886
tr|A0A024R7E3|A0A024R7E3_HUMAN	DNA (cytosine-5)-methyltransferase OS=Homo sapiens GN=DNMT1 PE=3 SV=1	0.705883
tr|A0A024R1Y2|A0A024R1Y2_HUMAN	ATP citrate lyase, isoform CRA_a OS=Homo sapiens GN=ACLY PE=4 SV=1	0.70474
tr|Q95IG5|Q95IG5_HUMAN	MHC class I antigen (Fragment) OS=Homo sapiens GN=HLA-B PE=3 SV=1	0.7012
sp|P63244|GBLP_HUMAN	Guanine nucleotide-binding protein subunit beta-2-like 1 OS=Homo sapiens GN=GNB2L1 PE=1 SV=3 >tr|E9KL35|E9KL35_HUMAN Epididymis tissue sperm binding protein Li 3a OS=Homo sapiens PE=2 SV=1	0.695635
tr|A8K168|A8K168_HUMAN	Malic enzyme OS=Homo sapiens PE=2 SV=1	0.686946
sp|Q86V21|AACS_HUMAN	Acetoacetyl-CoA synthetase OS=Homo sapiens GN=AACS PE=1 SV=1 >tr|A0A024RBV2|A0A024RBV2_HUMAN Acetoacetyl-CoA synthetase, isoform CRA_b OS=Homo sapiens GN=AACS PE=4 SV=1	0.684661
sp|P11388|TOP2A_HUMAN	DNA topoisomerase 2-alpha OS=Homo sapiens GN=TOP2A PE=1 SV=3	0.682858
sp|P35527|K1C9_HUMAN	Keratin, type I cytoskeletal 9 OS=Homo sapiens GN=KRT9 PE=1 SV=3	0.682106
sp|P30405|PPIF_HUMAN	Peptidyl-prolyl cis-trans isomerase F, mitochondrial OS=Homo sapiens GN=PPIF PE=1 SV=1 >tr|A0A024QZS4|A0A024QZS4_HUMAN Peptidyl-prolyl cis-trans isomerase OS=Homo sapiens GN=PPIF PE=3 SV=1	0.681297
tr|H0YIZ1|H0YIZ1_HUMAN	Epididymal secretory protein E1 (Fragment) OS=Homo sapiens GN=NPC2 PE=1 SV=1	0.680814
tr|B4DY28|B4DY28_HUMAN	cDNA FLJ61189, highly similar to Cysteine and glycine-rich protein 1 OS=Homo sapiens PE=2 SV=1	0.674715
tr|H3BPA3|H3BPA3_HUMAN	Cilia- and flagella-associated protein 20 (Fragment) OS=Homo sapiens GN=CFAP20 PE=1 SV=4	0.673944
tr|A0A024R814|A0A024R814_HUMAN	Ribosomal protein L7, isoform CRA_a OS=Homo sapiens GN=RPL7 PE=3 SV=1	0.665914
tr|E7EQV9|E7EQV9_HUMAN	Ribosomal protein L15 (Fragment) OS=Homo sapiens GN=RPL15 PE=1 SV=1	0.662044
tr|Q53F35|Q53F35_HUMAN	Acidic (Leucine-rich) nuclear phosphoprotein 32 family, member B variant (Fragment) OS=Homo sapiens PE=2 SV=1	0.659013
sp|Q13907|IDI1_HUMAN	Isopentenyl-diphosphate Delta-isomerase 1 OS=Homo sapiens GN=IDI1 PE=1 SV=2	0.65824
tr|A8K4W5|A8K4W5_HUMAN	cDNA FLJ76813, highly similar to Homo sapiens acetyl-Coenzyme A acetyltransferase 2 (acetoacetyl Coenzyme A thiolase), mRNA OS=Homo sapiens PE=2 SV=1	0.657499
tr|C9J4Z3|C9J4Z3_HUMAN	60S ribosomal protein L37a OS=Homo sapiens GN=RPL37A PE=4 SV=1	0.649234
tr|A0A087WYT3|A0A087WYT3_HUMAN	Prostaglandin E synthase 3 OS=Homo sapiens GN=PTGES3 PE=1 SV=1	0.612108
sp|Q16850|CP51A_HUMAN	Lanosterol 14-alpha demethylase OS=Homo sapiens GN=CYP51A1 PE=1 SV=3	0.609249
tr|B2RDQ3|B2RDQ3_HUMAN	cDNA, FLJ96718, highly similar to Homo sapiens splicing factor, arginine/serine-rich 10 (transformer 2 homolog, Drosophila) (SFRS10), mRNA OS=Homo sapiens PE=2 SV=1	0.609182
sp|Q15126|PMVK_HUMAN	Phosphomevalonate kinase OS=Homo sapiens GN=PMVK PE=1 SV=3 >tr|Q6FGV9|Q6FGV9_HUMAN PMVK protein (Fragment) OS=Homo sapiens GN=PMVK PE=2 SV=1	0.589915
tr|A0A087WUD3|A0A087WUD3_HUMAN	Oligosaccharyltransferase complex subunit OSTC OS=Homo sapiens GN=OSTC PE=1 SV=1	0.559011
tr|H3BQH3|H3BQH3_HUMAN	Kelch domain-containing protein 4 (Fragment) OS=Homo sapiens GN=KLHDC4 PE=4 SV=4	0.558388
tr|B4DL49|B4DL49_HUMAN	cDNA FLJ58073, moderately similar to Cathepsin B (EC 3.4.22.1) OS=Homo sapiens PE=2 SV=1	0.552746
sp|Q92896|GSLG1_HUMAN	Golgi apparatus protein 1 OS=Homo sapiens GN=GLG1 PE=1 SV=2	0.516208
sp|P62633|CNBP_HUMAN	Cellular nucleic acid-binding protein OS=Homo sapiens GN=CNBP PE=1 SV=1	0.508718
tr|B3KML9|B3KML9_HUMAN	cDNA FLJ11352 fis, clone HEMBA1000020, highly similar to Tubulin beta-2C chain OS=Homo sapiens PE=2 SV=1	0.473341
tr|Q5XJ04|Q5XJ04_HUMAN	3-hydroxy-3-methylglutaryl-Coenzyme A synthase 1 (Soluble) OS=Homo sapiens GN=HMGCS1 PE=2 SV=1	0.393641
